# Supplementary material for: Proteomic study explores AGR2 as pro-metastatic protein in HCC
Source: Royal Society of Chemistry journal article supplement (doi:10.1039/c2mb25160d), 2012-06-19

### **SUPPLEMENTARY FIGURES and FIGURE LEGENDS:**

**Supplementary Figure 1:** Overexpressed AGR2 is associated with HCC metastasis in HCC cell lines. A, 2DE images of proteins expressed in the four human hepatocarcinoma syngeneic-alike cell lines. High expression AGR2 was detected in HCCLM6 with high metastasis potential. B, A typical MS/MS spectra for representative peptides of AGR2.

**Supplementary Figure 2:** Proteome-wide identification of binding partners to AGR2. A, Flowchart of the SF-TAP procedure. Symbol:  for FLAG,  for SBP,  for AGR2,  for binding partner to AGR2, and  for non-interacting proteins. B, Western blot analysis of AGR2 immunoprecipitates from mock-transfected or SF-tagged AGR2-overexpressing HEK293T cells resolved by anti-FLAG antibody.

**Supplementary Figure 3:** Two examples of AGR2 interacting proteins identified by TAP and LC-MS/MS.

A: MS/MS Identification of TAK1. Eight tryptic peptides (red) identified by LC-MS/MS assigned to the TAK1, with total sequence coverage of 10.1%.

B: MS/MS Identification of STK4. Eight tryptic peptides (red) identified by LC-MS/MS assigned to the STK4, with total sequence coverage of 39.9%.

Representative MS/MS spectra for two peptides derived from TAK1 and STK4 are shown on the right respectively.

### Supplementary Figure 1

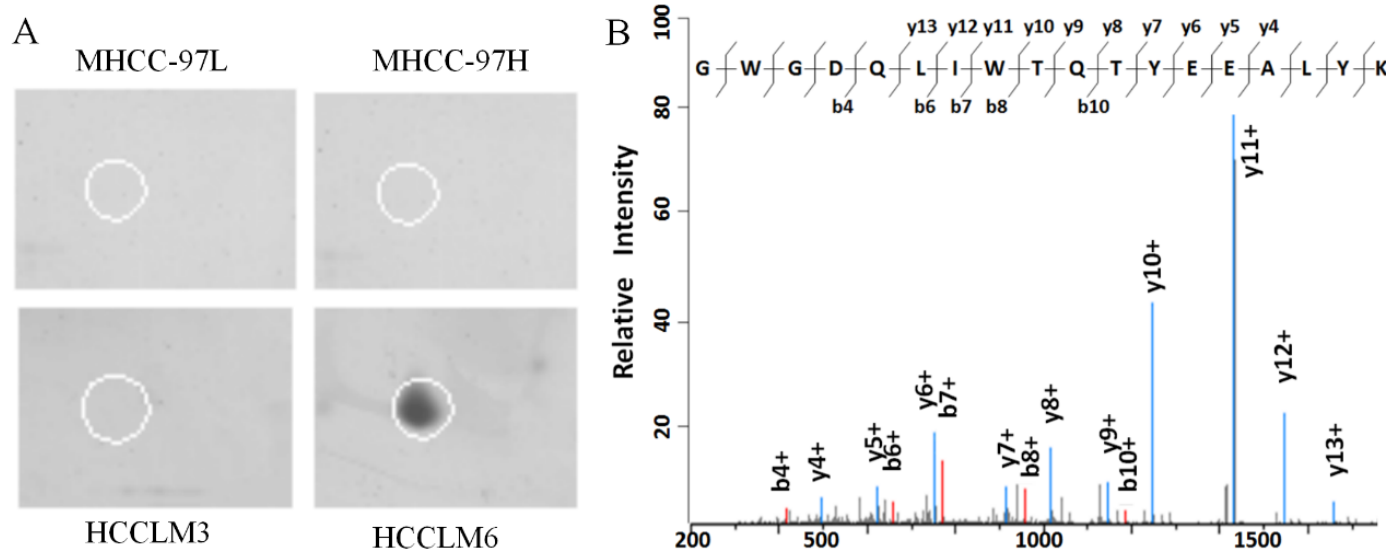

## Supplementary Figure 2

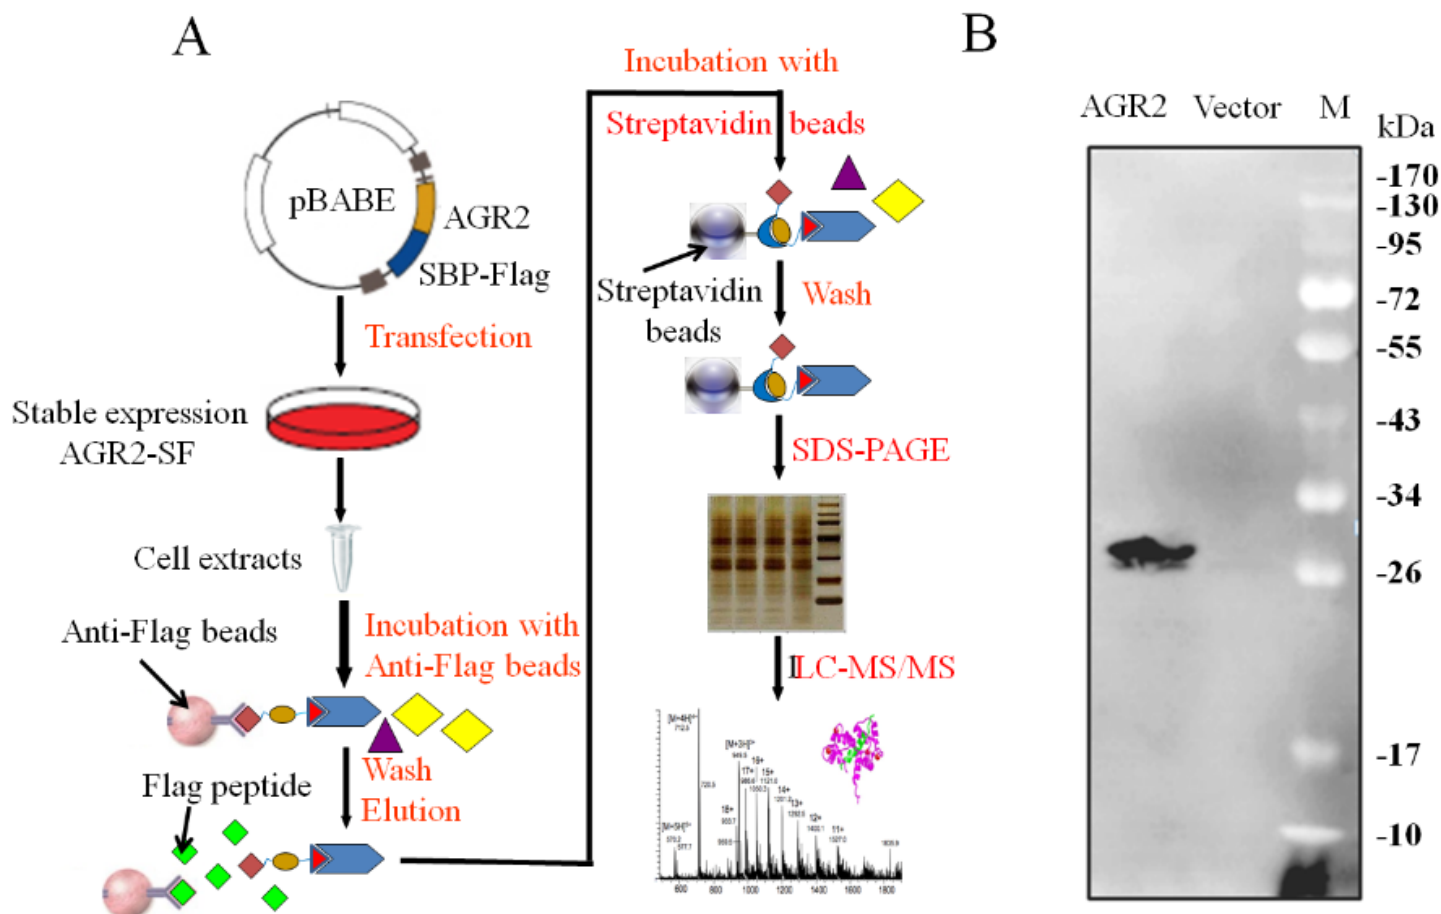

### Supplementary Figure 3

A

METVQLRNPPRRQLKLLDEDSLTK**QPEEVFDVLE**  
 KLGGESYGSVYKAIHKETGQIVAIKQVPVESDLQ  
 EIIKEISTMQCCDSPHVVKYYSYFKNTDLWIVM  
 EYCGAGSVSDIIRLRNKTLEDEIATILQSTLKG  
**LEYLHFMRKITHRDIKAGNILLNTEGHAKLADFGV**  
**AGQLTDTMAKRNTVIGTPFWMAPEVIQEIGYNCV**  
 ADIWSLGITATEMAEGKPPYADIIHPMRA**IFMIP**  
**NPPPTFRKPELWSDNFTDFVKQCLVKSPEQRATA**  
 TQLLQHPFVRSAGVSLRDLIN**EAMDVKLKRQE**  
**SQQREVDQDDEENSEEDE**MDSGTMVRAVGDEMG  
 VRVASTMTDGANTMEHDDTLPSQLGTMVINAED  
 EEEEGTMKRREDETMQPAKPSFLEYFEQKEKENQI  
 NSFSGSVPGPLKNSSDW**KIPQDGDYEF**LKSWTVE  
 DLQKRLLALD**PMMEQEIEE**TRKQYQSKR**QPILDA**  
**TEAKRRRQQNF**

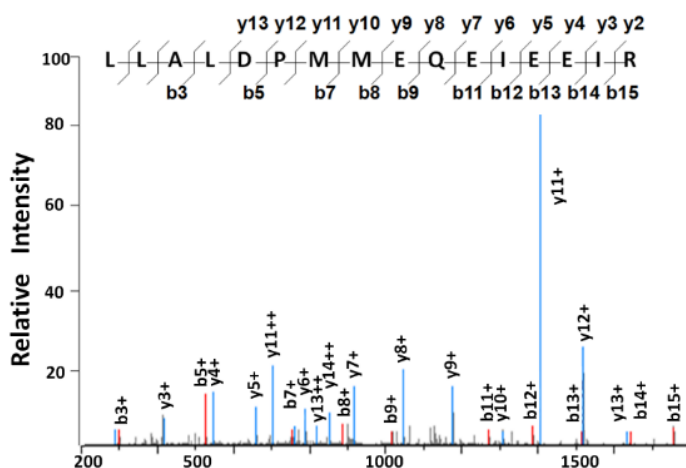

B

MSTASAASSSSSSAGEMTEAPSQVLNFEEIDYKE  
 IEVEEVYGRGAFGVVCKAKWRADVAIRQIESESE  
**RKAFIVELRQLSRVNHPIV**KLYGACLNPCLVME  
 YAEGGSLYNVLHGAEPYPYTAHAMSWCLQCSQG  
 VAYLHSMQPKAL**IHRDLKPPNLLVAGGT**VLKICD  
 FGTACDIQTHMTNNGSAAMMAPEVFEQSNSYSEK  
 DVFSWGIIILWEVITRRKPFDEIGGPAFRIM**WAVHN**  
**GTRPPLIK**NLPKPIESLMTRCWSKDPSPQPSMEEI  
 VKIMTHLMRYFPGADEPLQYPCQYSDEGQNSATS  
 TGSFMDIASTNTSNKSDT**NMEQVPATNDTI**KRLES  
 KLLKNQAKQSESGRLSLGASRGSSVESLPPTSEG  
 KRMSADMSEIEARIAATTAYSKPKRGHRK6**TASFG**  
**NILDVPEIIVISGNGQPRRSIQDLTYVTGTEPGQVS**  
**SRSSSPSVRMITTS**SGPTSEKPTRSHPWTPDDSDT  
 NGSDNSIPMAYLTL**DHQL**PLAPCNSKESMAVFE  
 QHCKMAQEMKVQTEIALL**QRKQELVAELDQDEK**  
 DQQNTSRLVQEHKLLDENKSLSTYY**QCKKQLEV**  
**IRSQQKRQGTS**

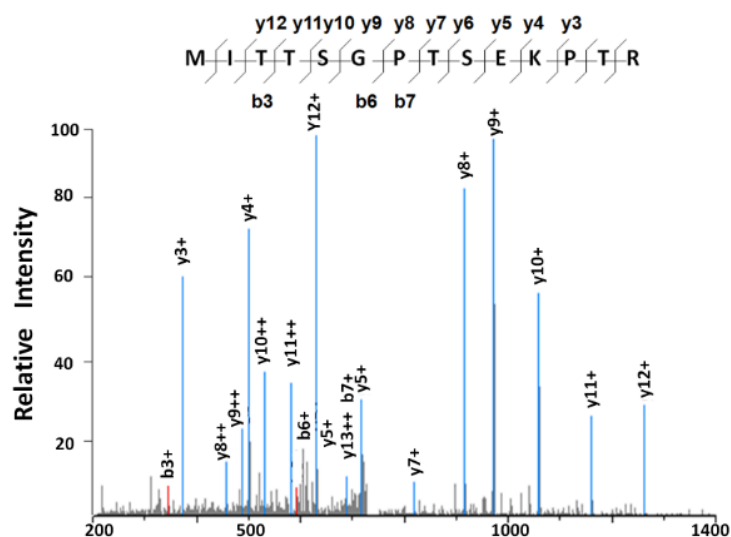

Supplement: c2mb25160d_2.pdf [file c2mb25160d_2.pdf]
