# Supplementary material for: Proteomic study explores AGR2 as pro-metastatic protein in HCC
Source: Royal Society of Chemistry journal article supplement (doi:10.1039/c2mb25160d), 2012-06-19
Supplement: c2mb25160d.pdf [file c2mb25160d.pdf]

**SUPPLEMENTARY TABLE and TABLE LEGENDS:**

**Supplementary Table 1: Clinicopathological Correlation of AGR2 mRNA  
Expression in HCC (n =48)**

**Supplementary Table 2: Three top networks identified by IPA**

**Supplementary Table 1**

| Clinicopathological Features | Number | AGR2 Overexpression | <i>P</i> |
|------------------------------|--------|---------------------|----------|
| SEX                          |        |                     |          |
| Female                       | 11     | 4(36.36%)           | 0.87     |
| Male                         | 37     | 17(45.95)           |          |
| AGE                          |        |                     |          |
| >50                          | 34     | 13(38.23%)          | 0.661    |
| ≤50                          | 14     | 8(57.14)            |          |
| AFP                          |        |                     |          |
| >400                         | 11     | 6(54.54%)           | 0.498    |
| ≤400                         | 37     | 15(40.54%)          |          |
| Tumor capsule                |        |                     |          |
| Positive                     | 21     | 6(28.57%)           | 0.002    |
| Negative                     | 27     | 15(55.56%)          |          |
| Tumor thrombi                |        |                     |          |
| Present                      | 19     | 11(57.89%)          | 0.094    |
| Absent                       | 29     | 10(34.48%)          |          |
| Metastasis                   |        |                     |          |
| Present                      | 24     | 14(58.33%)          | 0.0006   |
| Absent                       | 24     | 7(29.17%)           |          |
| Number of tumors             |        |                     |          |
| 1                            | 39     | 18(46.25%)          | 0.782    |
| ≥2                           | 9      | 3(33.33%)           |          |
| Tumor size (cm) <sup>1</sup> |        |                     |          |
| >5                           | 22     | 10(45.45%)          | 0.404    |
| ≤5                           | 26     | 11(42.31%)          |          |
| TNM staging                  |        |                     |          |
| I                            | 32     | 10(31.25%)          | 0.003    |
| II-III                       | 16     | 11(68.75%)          |          |

1. Tumor size was measured by the length of the largest tumor nodule.

**Supplementary Table 2:** Three top networks identified by IPA

| ID | Molecules in Network                                                                                                                                                                                                                                                                                                                  | Score | Focus Molecules | Top Functions                                                       |
|----|---------------------------------------------------------------------------------------------------------------------------------------------------------------------------------------------------------------------------------------------------------------------------------------------------------------------------------------|-------|-----------------|---------------------------------------------------------------------|
| 1  | ATMIN, Caspase, EDARADD, EPS15, ERK, IKK (complex), Ikk (family), IL1, IL17RD, Jnk, KIR2DS2, MAP3K7, Map3k7-Map3k7ip1-Map3k7ip2, Mapk kinase, MAS1, NFkB (complex), P38 MAPK, PDCD6, Ras, RASSF5, SAV1, STK3, STK4, TAB1, TAB2, Tab1-Tak1, TAB2-TAK1, TIPRL, TRAF1-TRAF2-TRAF3, TRAF6-TAB2-TAK1, UBE2V1, Ubiquitin, UBR5, VRK2, WDR34 | 22    | 9               | Embryonic Development, Tissue Development, Gene Expression          |
| 2  | AASS, ADK, AGR2, ALDH18A1, ATAD3A, CDC42SE1, DHX15, ERBB2, ERLIN2, ESPL1, GYG1, HECTD1, LSR, MAP1B, MFAP1, MLXIP, MYC, MYO9A, NNMT, PRL2C3, PSME4, PXN, ROR1, RPL17, SF3B3, SLC25A5, SOLH, SPAG4, SPOCK1, SQRDL (includes EG:58472), SYCP3, TAX1BP3, TBC1D1, TGFB1, YWHAG                                                             | 22    | 9               | Cell Cycle, Hair and Skin Development and Function, Cell Morphology |
| 3  | FAF1, KLHL22, UBXN1, UBXN7                                                                                                                                                                                                                                                                                                            | 3     | 1               | Protein Trafficking, Cell Signaling, Molecular Transport            |
